# Supplementary material for: Individual small in‐stream barriers contribute little to strong local population genetic structure five strictly aquatic macroinvertebrate taxa
Source: PubMed Central journal article supplement (PMC9006233; doi:10.1002/ece3.8807), 2022-04-13

**Appendix S3:** Results of the Linear mixed models and plots showing the distribution of  $F_{ST}$  values in the different categories. For model 1 categories of fixed effects are if a barrier was present (barrieryes) or not present (barrierno) between populations; for model 2 barriers were subdivided into barrier type, i.e. weir (QB), pipes (PI), and tunnels (VR).

**A) *Gammarus fossarum***

**Model 1**

Linear mixed model fit by REML. t-tests use Satterthwaite's method ['lmerModLmerTest']

Formula:  $F_{st} \sim \text{barrier} + (1 \mid \text{site})$

Data: Gf

REML criterion at convergence: -350.6

Scaled residuals:

| Min     | 1Q      | Median  | 3Q     | Max    |
|---------|---------|---------|--------|--------|
| -2.3498 | -0.4975 | -0.1185 | 0.3279 | 4.1682 |

Random effects:

| Groups   | Name        | Variance | Std.Dev. |
|----------|-------------|----------|----------|
| site     | (Intercept) | 1.20E-05 | 0.003462 |
| Residual |             | 5.25E-05 | 0.007248 |

Number of obs: 54, groups: site, 13

Fixed effects:

|             | Estimate  | Std. Error | df        | t value | Pr(> t ) |
|-------------|-----------|------------|-----------|---------|----------|
| (Intercept) | 0.005447  | 0.001942   | 35.5473   | 2.804   | 0.00812  |
| barrieryes  | -0.005365 | 0.002073   | 41.950435 | -2.589  | 0.01318  |

Correlation of Fixed Effects:

|            | (Intr) |
|------------|--------|
| barrieryes | -0.695 |

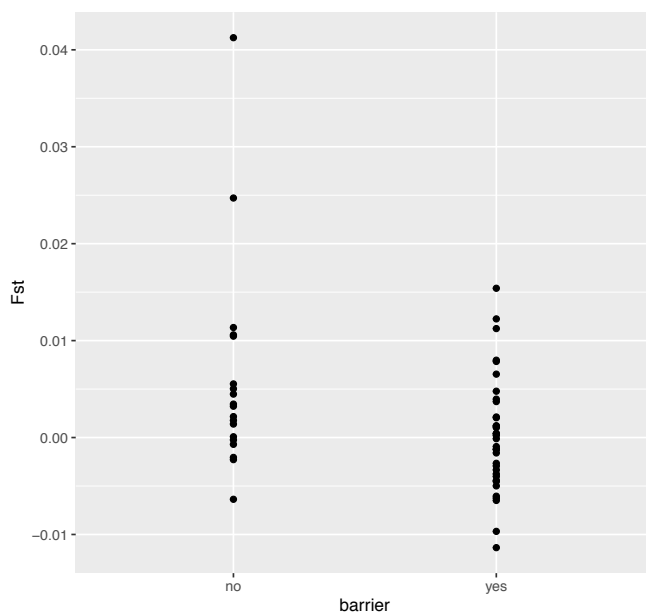

### Model 2:

Linear mixed model fit by REML. t-tests use Satterthwaite's method ['lmerModLmerTest']

Formula: Fst ~ QB\_VR + (1 | site)

Data: Gf

REML criterion at convergence: -335.1

Scaled residuals:

| Min     | 1Q      | Median  | 3Q     | Max    |
|---------|---------|---------|--------|--------|
| -2.2227 | -0.4528 | -0.1817 | 0.3692 | 4.0321 |

Random effects:

| Groups   | Name        | Variance | Std.Dev. |
|----------|-------------|----------|----------|
| site     | (Intercept) | 1.02E-05 | 0.003197 |
| Residual |             | 5.25E-05 | 0.007242 |

Number of obs: 54, groups: site, 13

Fixed

effects:

|             | Estimate  | Std. Error | df        | t value | Pr(> t ) |
|-------------|-----------|------------|-----------|---------|----------|
| (Intercept) | 0.007317  | 0.002223   | 34.453138 | 3.291   | 0.00231  |
| QB_VRPI     | -0.004430 | 0.004566   | 45.357405 | -0.970  | 0.33709  |
| QB_VRQB     | -0.007590 | 0.002805   | 39.063663 | -2.706  | 0.01004  |
| QB_VRVR     | -0.007312 | 0.002914   | 48.530008 | -2.510  | 0.01547  |

Correlation of Fixed Effects:

|         | (Intr) | QB_VRP | QB_VRQ |
|---------|--------|--------|--------|
| QB_VRPI | -0.407 |        |        |
| QB_VRQB | -0.724 | 0.295  |        |
| QB_VRVR | -0.548 | 0.223  | 0.397  |

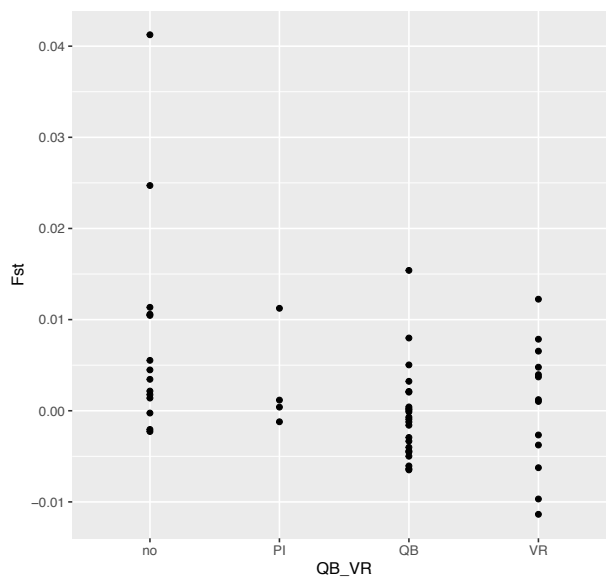

## B) *Dugesia gonocephala*

### Model 1

Linear mixed model fit by REML. t-tests use Satterthwaite's method ['lmerModLmerTest']

Formula:  $Fst \sim barrier + (1 | site)$

Data: Dg

REML criterion at convergence: -283.6

Scaled residuals:

| Min     | 1Q      | Median  | 3Q    | Max   |
|---------|---------|---------|-------|-------|
| -2.1552 | -0.2949 | -0.0982 | 0.169 | 3.659 |

Random effects:

| Groups   | Name        | Variance  | Std.Dev. |
|----------|-------------|-----------|----------|
| site     | (Intercept) | 0.0001902 | 0.01379  |
| Residual |             | 0.0004301 | 0.02074  |

Number of obs: 64, groups: site, 15

Fixed effects:

|             | Estimate | Std. Error | df        | t value | Pr(> t ) |
|-------------|----------|------------|-----------|---------|----------|
| (Intercept) | 0.005583 | 0.005794   | 35.565882 | 0.964   | 0.342    |
| barrieryes  | 0.005609 | 0.005486   | 51.171561 | 1.022   | 0.311    |

Correlation of Fixed Effects:

|            | (Intr) |
|------------|--------|
| barrieryes | -0.629 |

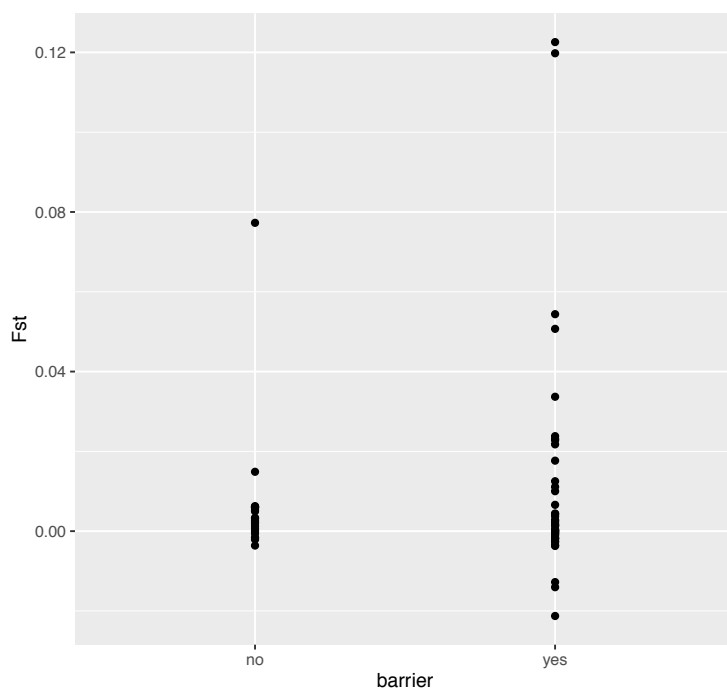

## Model 2

Linear mixed model fit by REML. t-tests use Satterthwaite's method ['lmerModLmerTest']

Formula:  $Fst \sim QB\_VR + (1 \mid site)$

Data: Dg

REML criterion at convergence: -270.2

Scaled residuals:

| Min     | 1Q      | Median  | 3Q     | Max    |
|---------|---------|---------|--------|--------|
| -2.3198 | -0.3057 | -0.1534 | 0.1584 | 3.6732 |

Random effects:

| Groups   | Name        | Variance  | Std.Dev. |
|----------|-------------|-----------|----------|
| site     | (Intercept) | 0.0001908 | 0.01381  |
| Residual |             | 0.0004434 | 0.02106  |

Number of obs: 64, groups: site, 15

Fixed effects:

|             | Estimate  | Std. Error | df        | t value | Pr(> t ) |
|-------------|-----------|------------|-----------|---------|----------|
| (Intercept) | 0.009316  | 0.006624   | 36.85713  | 1.407   | 0.168    |
| QB_VRP      | 0.00725   | 0.016006   | 51.817602 | 0.453   | 0.652    |
| QB_VRQB     | 0.002427  | 0.007937   | 55.158053 | 0.306   | 0.761    |
| QB_VRVR     | -0.006858 | 0.007738   | 57.339048 | -0.886  | 0.379    |

Correlation of Fixed Effects:

|         | (Intr) | QB_VRP | QB_VRQ |
|---------|--------|--------|--------|
| QB_VRP  | -0.334 |        |        |
| QB_VRQB | -0.653 | 0.218  |        |
| QB_VRVR | -0.461 | 0.154  | 0.301  |

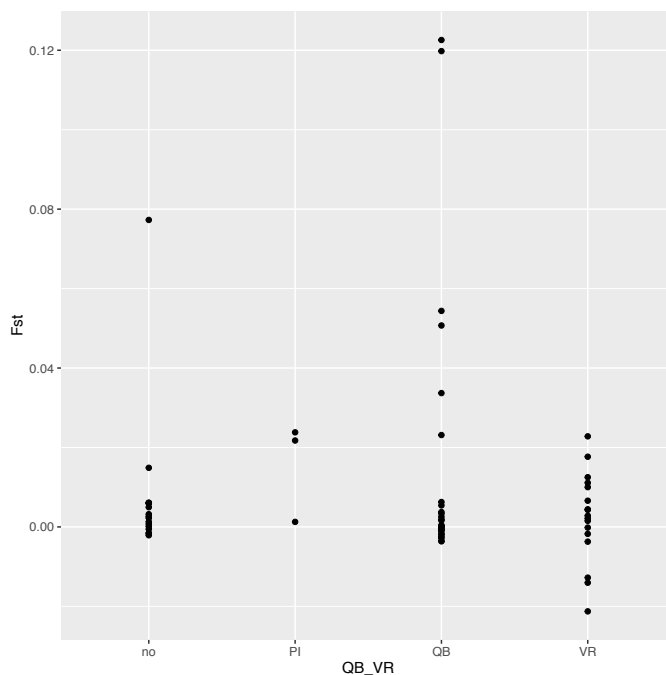

### C) *Ancylus fluviatilis* (all taxa combined)

#### Model 1

Linear mixed model fit by REML. t-tests use Satterthwaite's method ['lmerModLmerTest']

Formula:  $Fst \sim barrier + (1 | site)$

Data: Af

REML criterion at convergence: -334.6

Scaled residuals:

| Min     | 1Q      | Median  | 3Q     | Max    |
|---------|---------|---------|--------|--------|
| -3.0423 | -0.4379 | -0.1071 | 0.4284 | 3.2007 |

Random effects:

| Groups   | Name        | Variance  | Std.Dev. |
|----------|-------------|-----------|----------|
| site     | (Intercept) | 0.0003382 | 0.01839  |
| Residual |             | 0.0001878 | 0.01371  |

Number of obs: 67, groups: site, 17

Fixed effects:

|             | Estimate | Std. Error | df        | t value | Pr(> t ) |
|-------------|----------|------------|-----------|---------|----------|
| (Intercept) | 0.006888 | 0.005479   | 22.904422 | 1.257   | 0.2214   |
| barrieryes  | 0.006325 | 0.003625   | 48.495829 | 1.745   | 0.0873   |

Correlation of Fixed Effects:

|            | (Intr) |
|------------|--------|
| barrieryes | -0.466 |

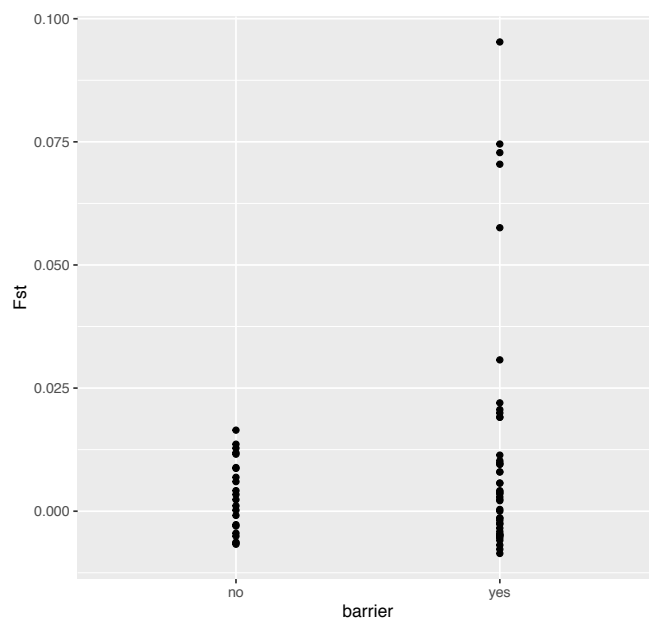

### Model 2:

Linear mixed model fit by REML. t-tests use Satterthwaite's method ['lmerModLmerTest']

Formula:  $Fst \sim QB\_VR + (1 \mid site)$

Data: Af

REML criterion at convergence: -345.7

Scaled residuals:

| Min     | 1Q      | Median  | 3Q   | Max    |
|---------|---------|---------|------|--------|
| -1.7256 | -0.4464 | -0.0584 | 0.41 | 3.6608 |

Random effects:

| Groups   | Name        | Variance  | Std.Dev. |
|----------|-------------|-----------|----------|
| site     | (Intercept) | 0.0002311 | 0.0152   |
| Residual |             | 0.0001283 | 0.01133  |

Number of obs: 67, groups: site, 17

Fixed effects:

|             | Estimate | Std. Error | df       | t value | Pr(> t ) |
|-------------|----------|------------|----------|---------|----------|
| (Intercept) | 7.38E-05 | 5.16E-03   | 2.55E+01 | 0.014   | 0.989    |
| QB_VRPI     | 4.38E-02 | 7.36E-03   | 5.73E+01 | 5.95    | 1.71E-07 |
| QB_VRQB     | 2.05E-03 | 4.96E-03   | 6.22E+01 | 0.414   | 0.68     |
| QB_VRVR     | 4.97E-03 | 5.30E-03   | 5.23E+01 | 0.937   | 0.353    |

Correlation of Fixed Effects:

|         | (Intr) | QB_VRP | QB_VRQ |
|---------|--------|--------|--------|
| QB_VRPI | -0.429 |        |        |
| QB_VRQB | -0.532 | 0.228  |        |
| QB_VRVR | -0.191 | 0.082  | 0.102  |

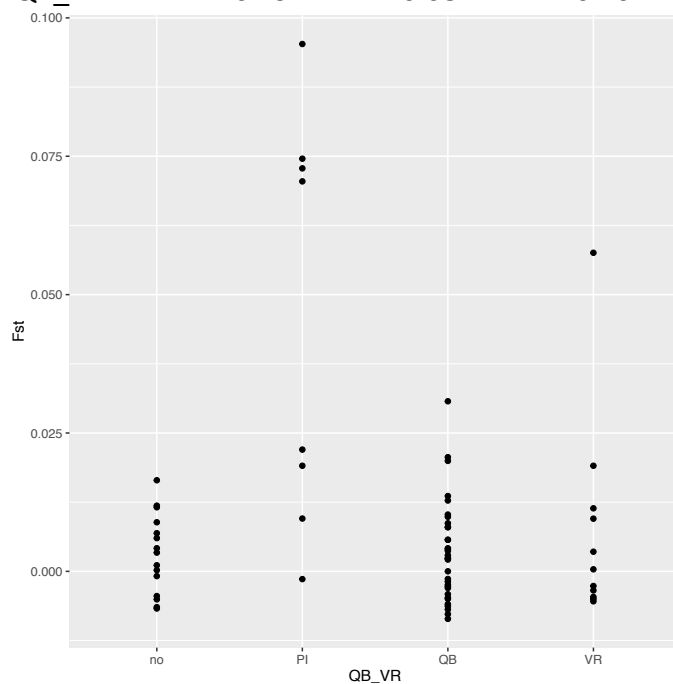

Supplement: ECE3-12-e8807-s003.pdf [file ECE3-12-e8807-s003.pdf]
