# Supplementary material for: Individual small in‐stream barriers contribute little to strong local population genetic structure five strictly aquatic macroinvertebrate taxa
Source: PubMed Central journal article supplement (PMC9006233; doi:10.1002/ece3.8807), 2022-04-13
Supplement: ECE3-12-e8807-s005.pdf [file ECE3-12-e8807-s005.pdf]

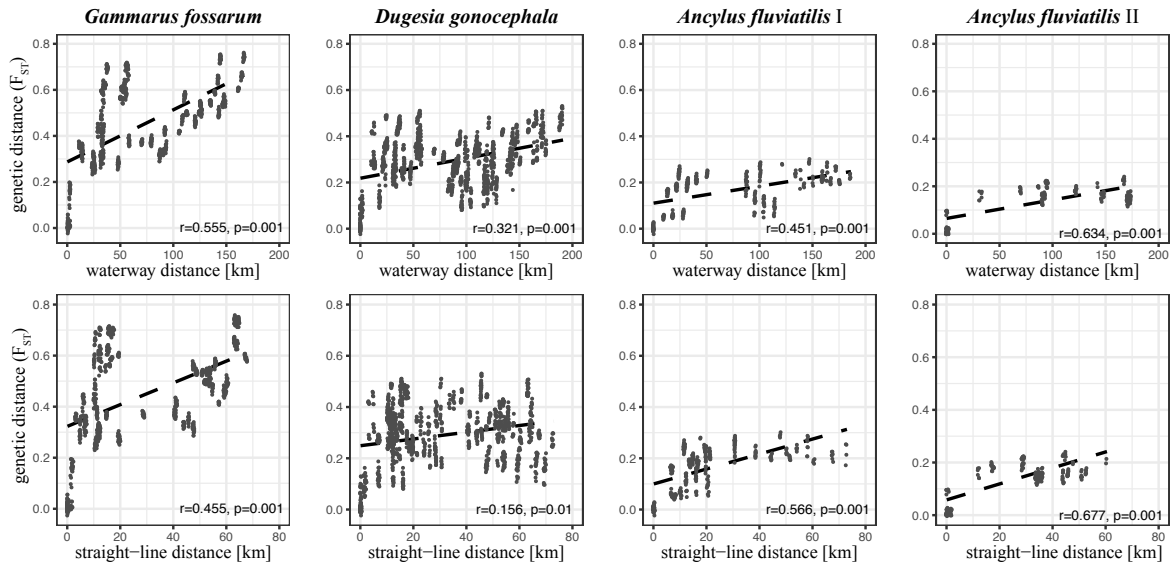

**Figure S4.** Correlation between pairwise genetic distance ( $F_{ST}$ ) among single sampling sites and geographic distances (first row waterway distance; second row straight-line distance) for *G. fossarum*, *D. gonocephala*, *A. fluviatilis* I and *A. fluviatilis* II (different columns).
