# Supplementary material for: Individual small in‐stream barriers contribute little to strong local population genetic structure five strictly aquatic macroinvertebrate taxa
Source: PubMed Central journal article supplement (PMC9006233; doi:10.1002/ece3.8807), 2022-04-13

**Figure S7:** Plots showing changes in allelic richness (page 1 -2) and observed heterozygosity (page 3-4) among populations over generations for different Nemo simulation scenarios. The barrier, introduced after 100 generations is indicated by a red line. A representative subset of simulations is shown. Results were similar for all migration matrices and barrier models and are therefore only shown for *asymmetric15* (mas15) and the most differing barrier models (cb = complete barrier, ub = upstream barrier). Simulations without extinction (ex0.0) and an extinction rate of 60% per generation (ex0.6) are shown either for random mating populations (page 1 & 3) or for hermaphrodites (indicated by mp0.3 for mating proportion/selfing rate, page 2 and 4). Patch capacities of 100, 500 and 2000 are shown (cap0100/0500/2000).

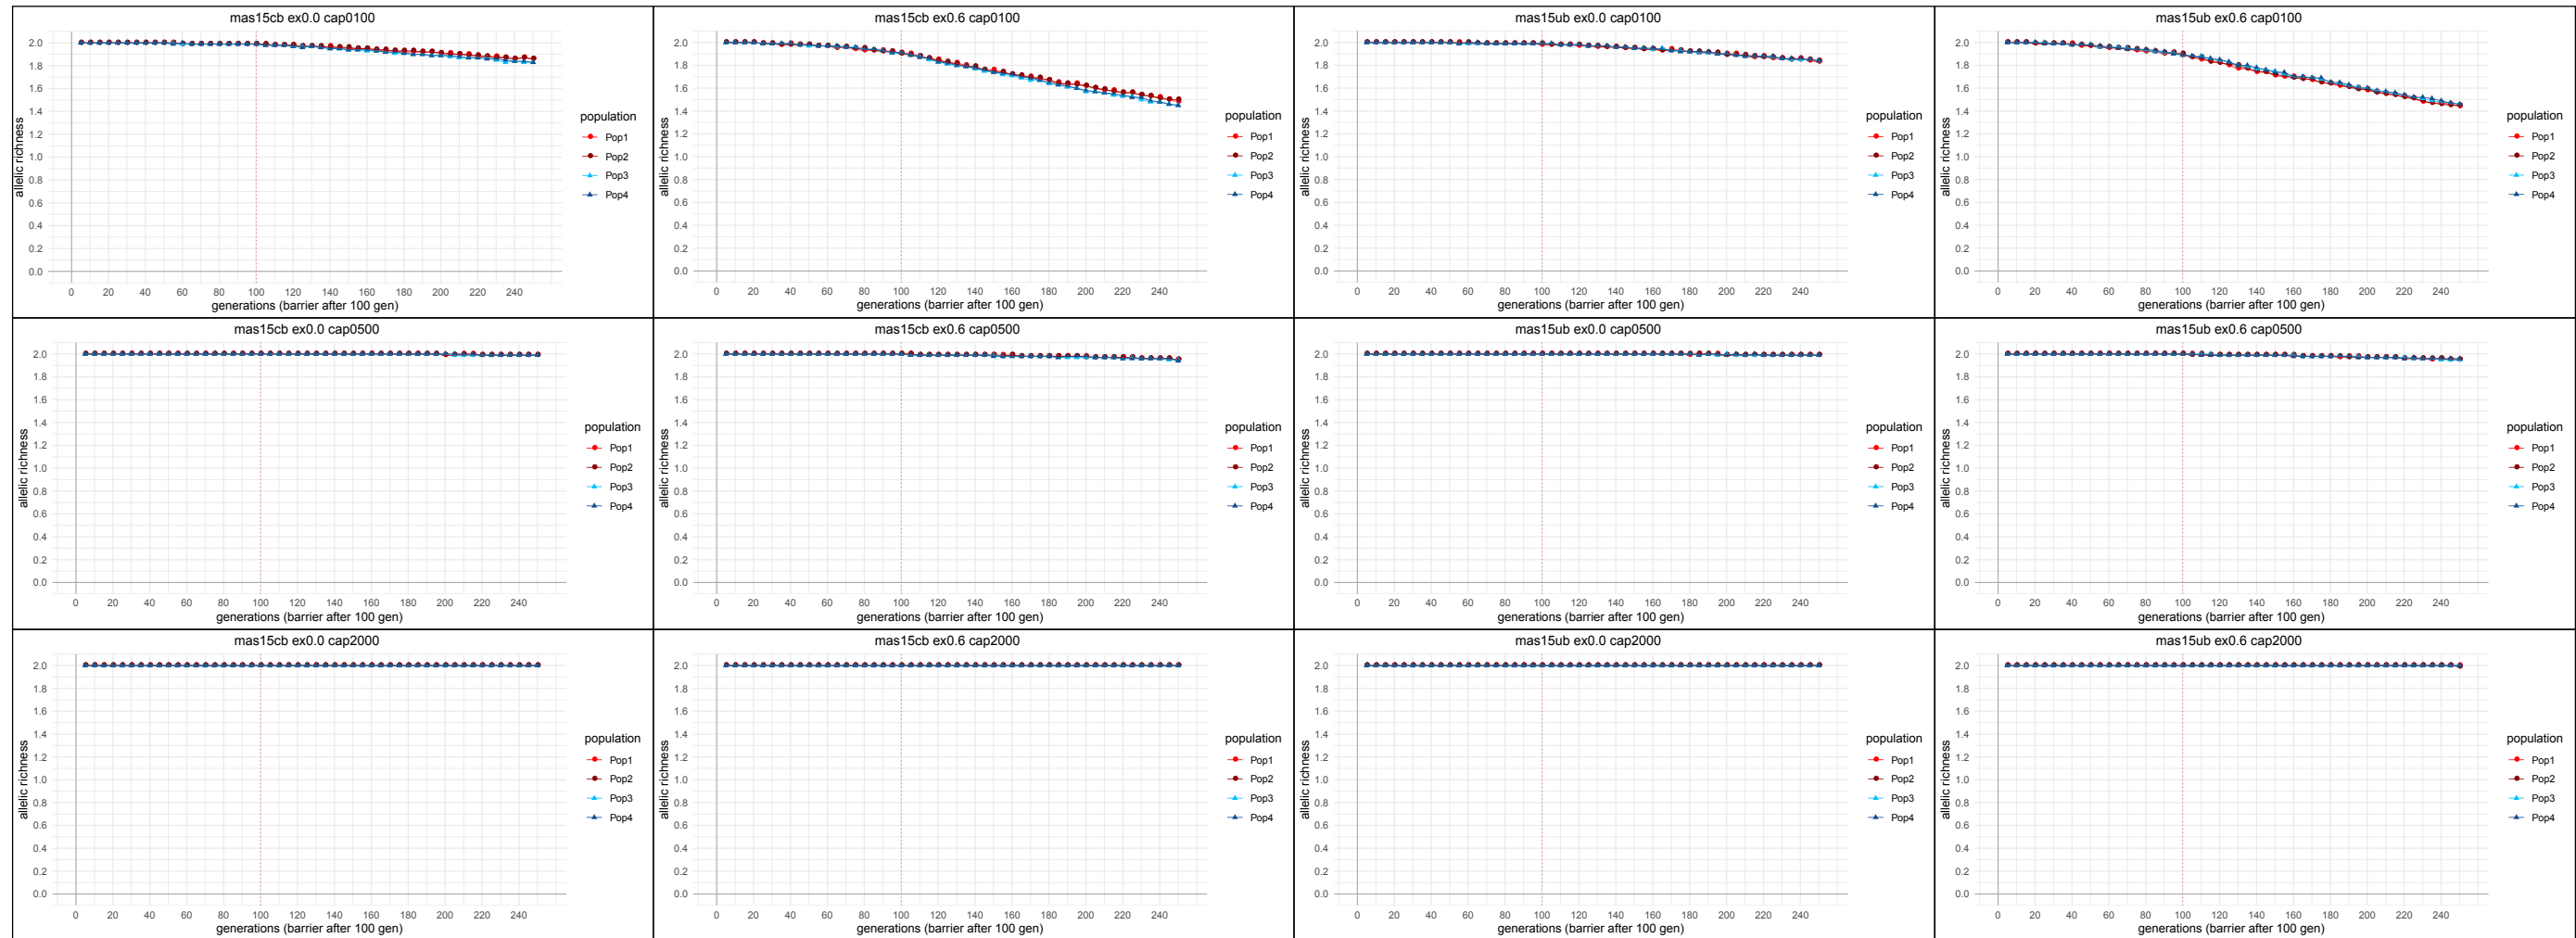

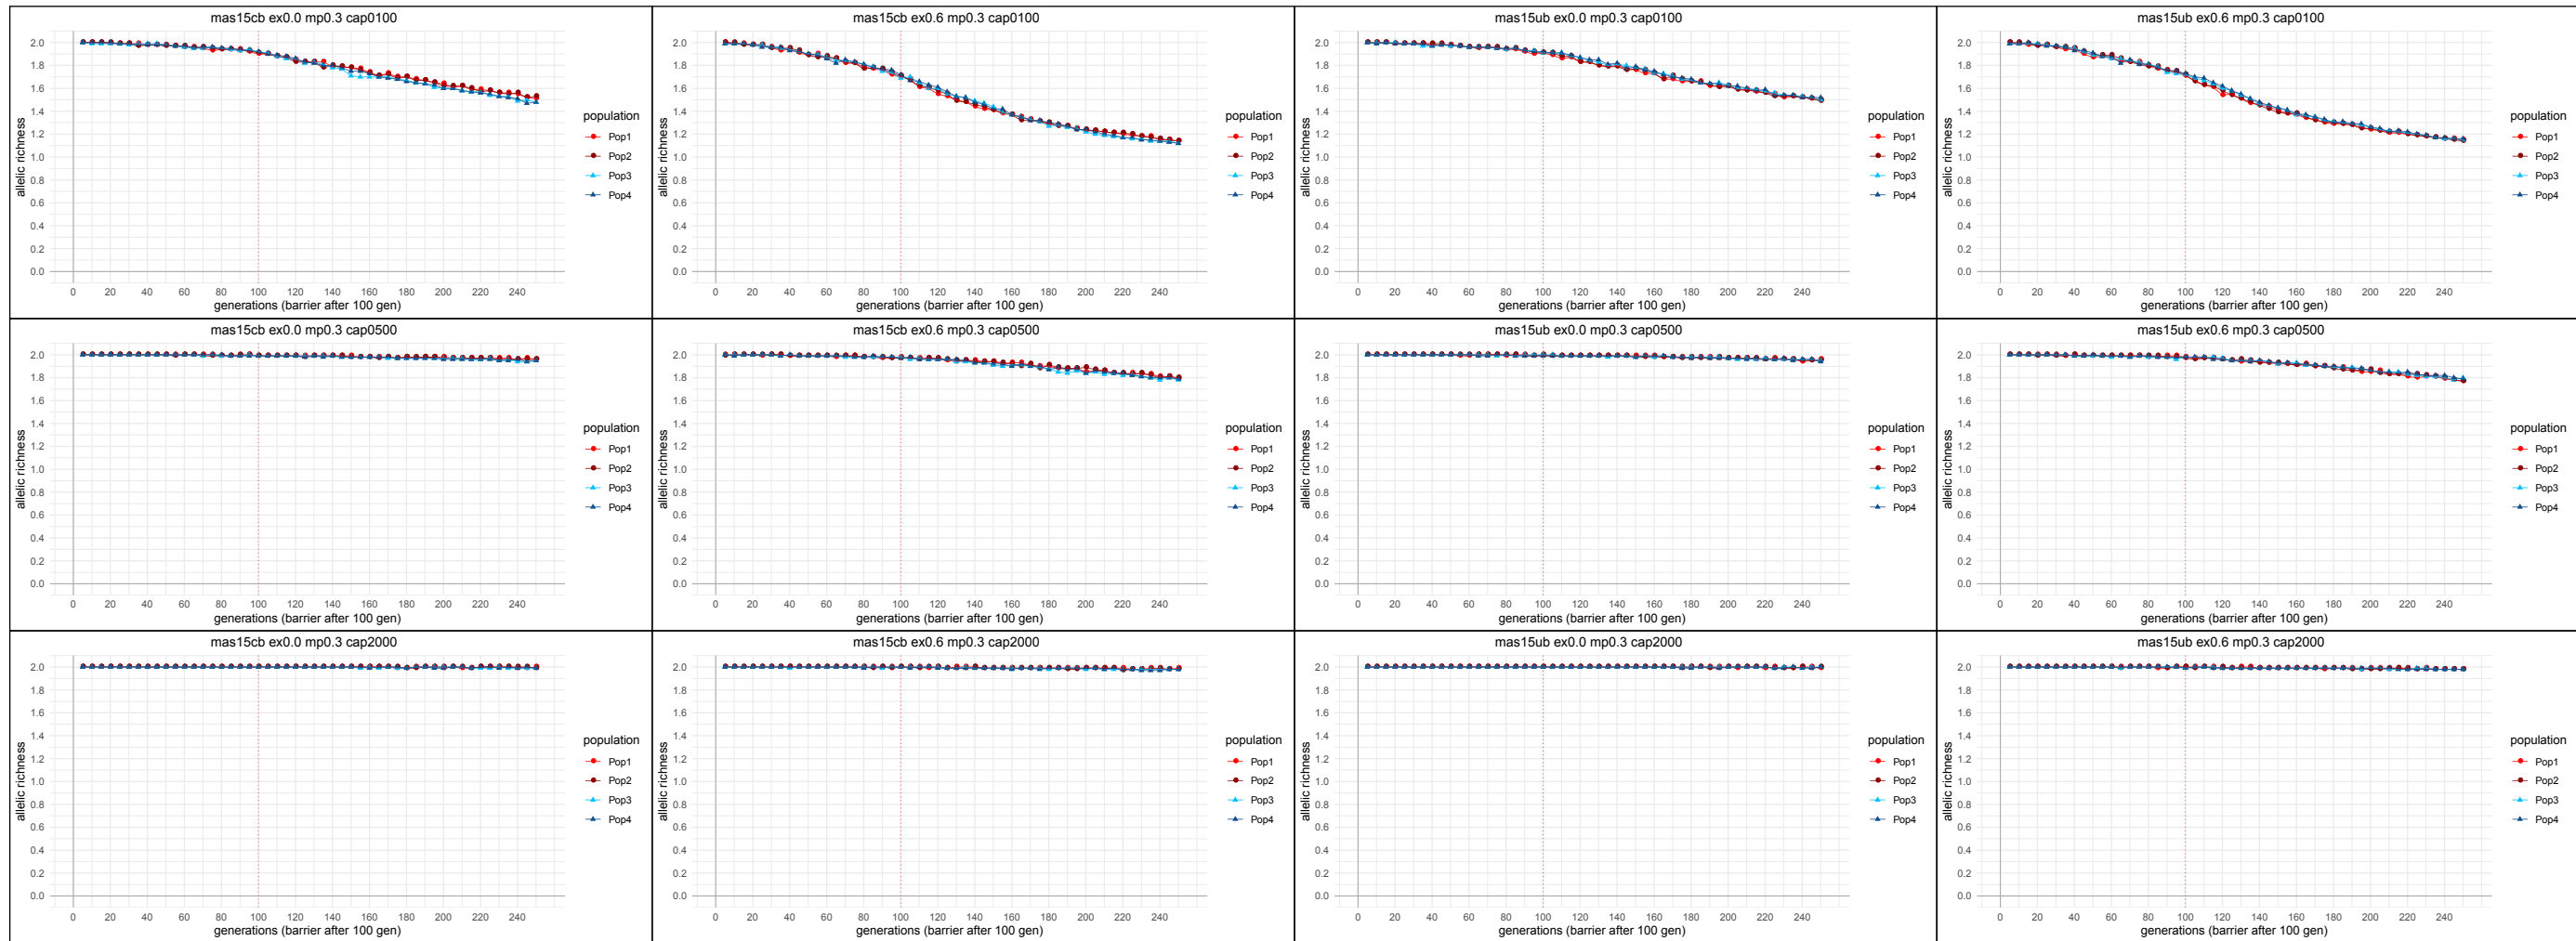

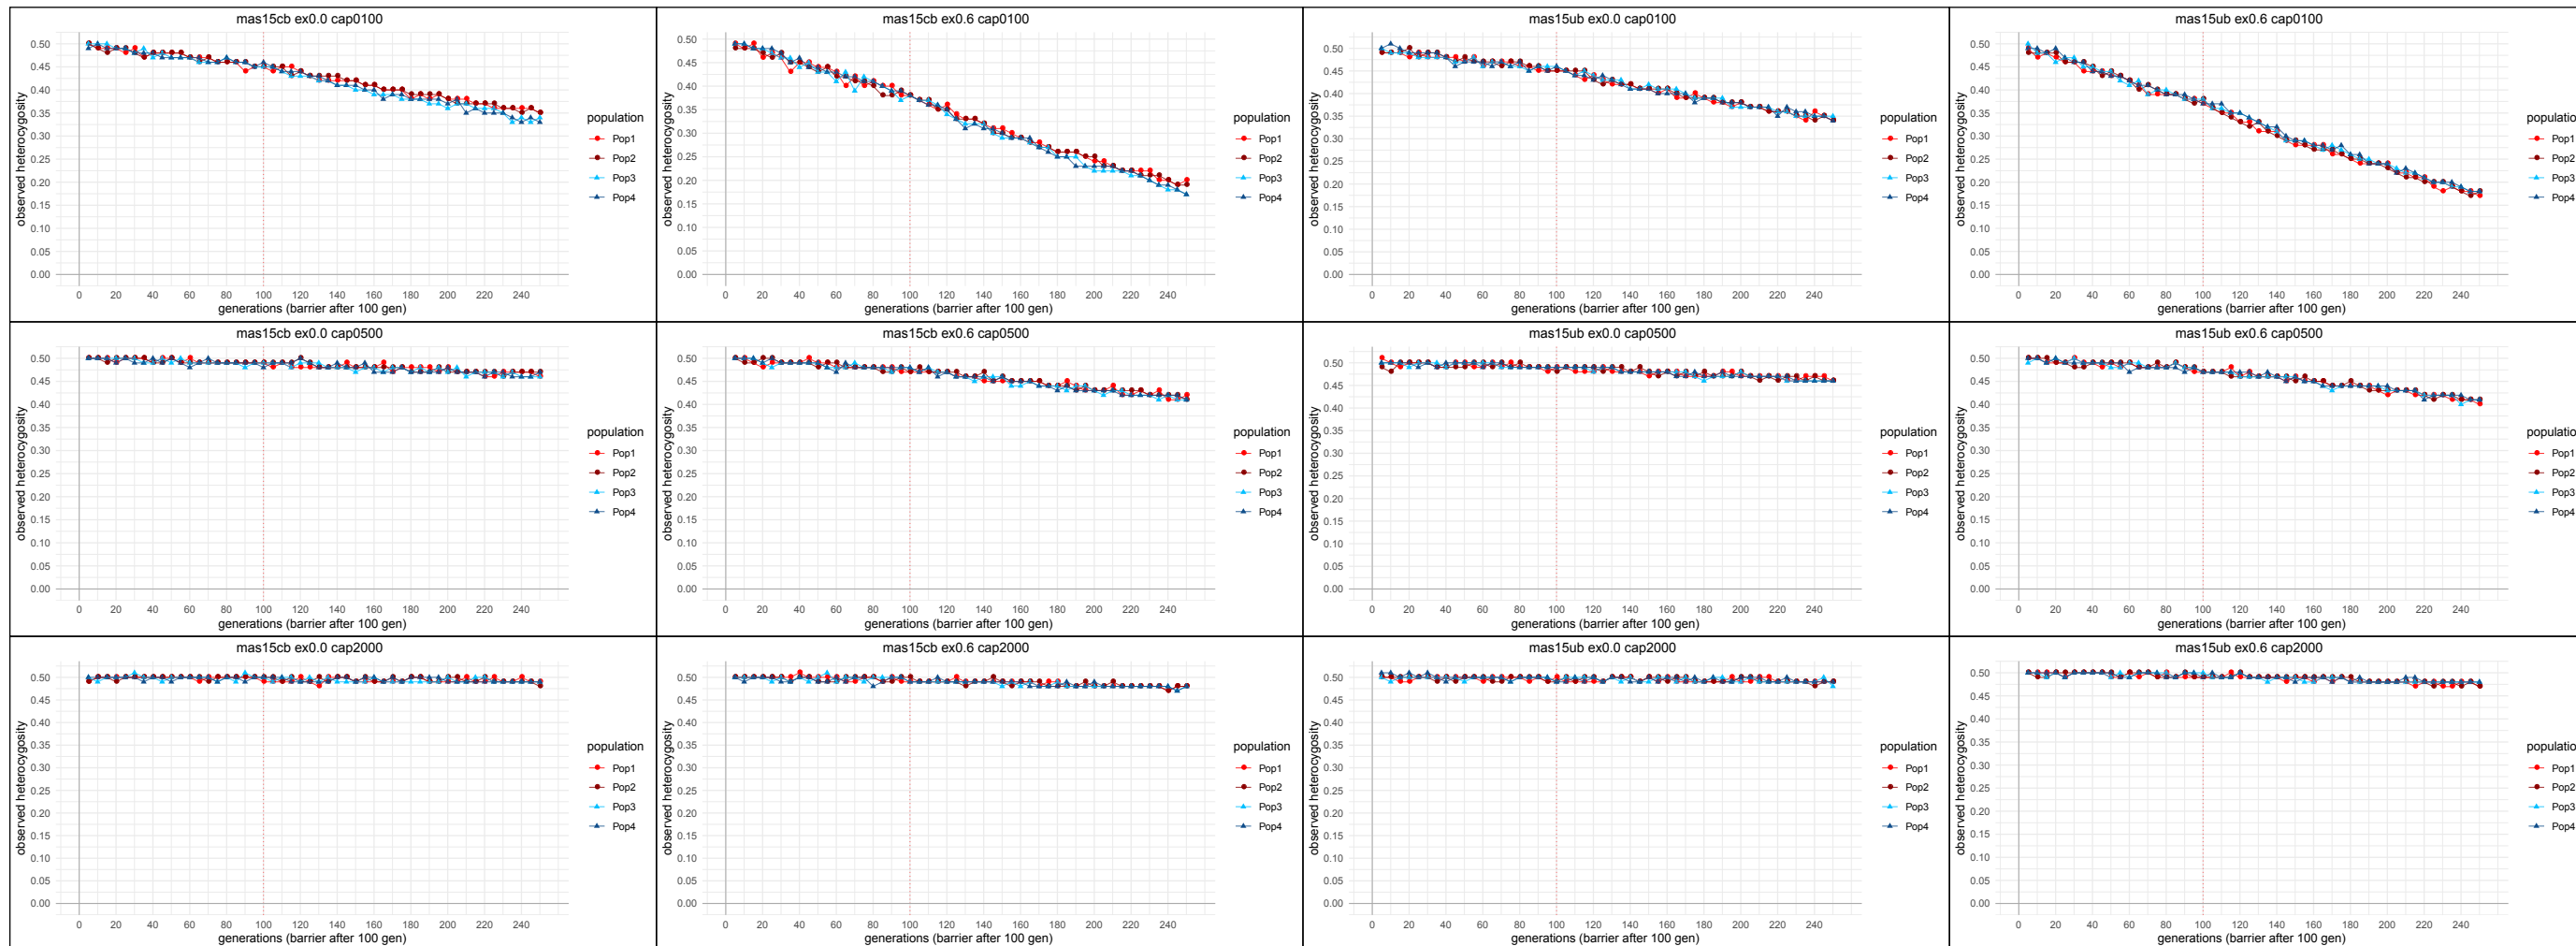

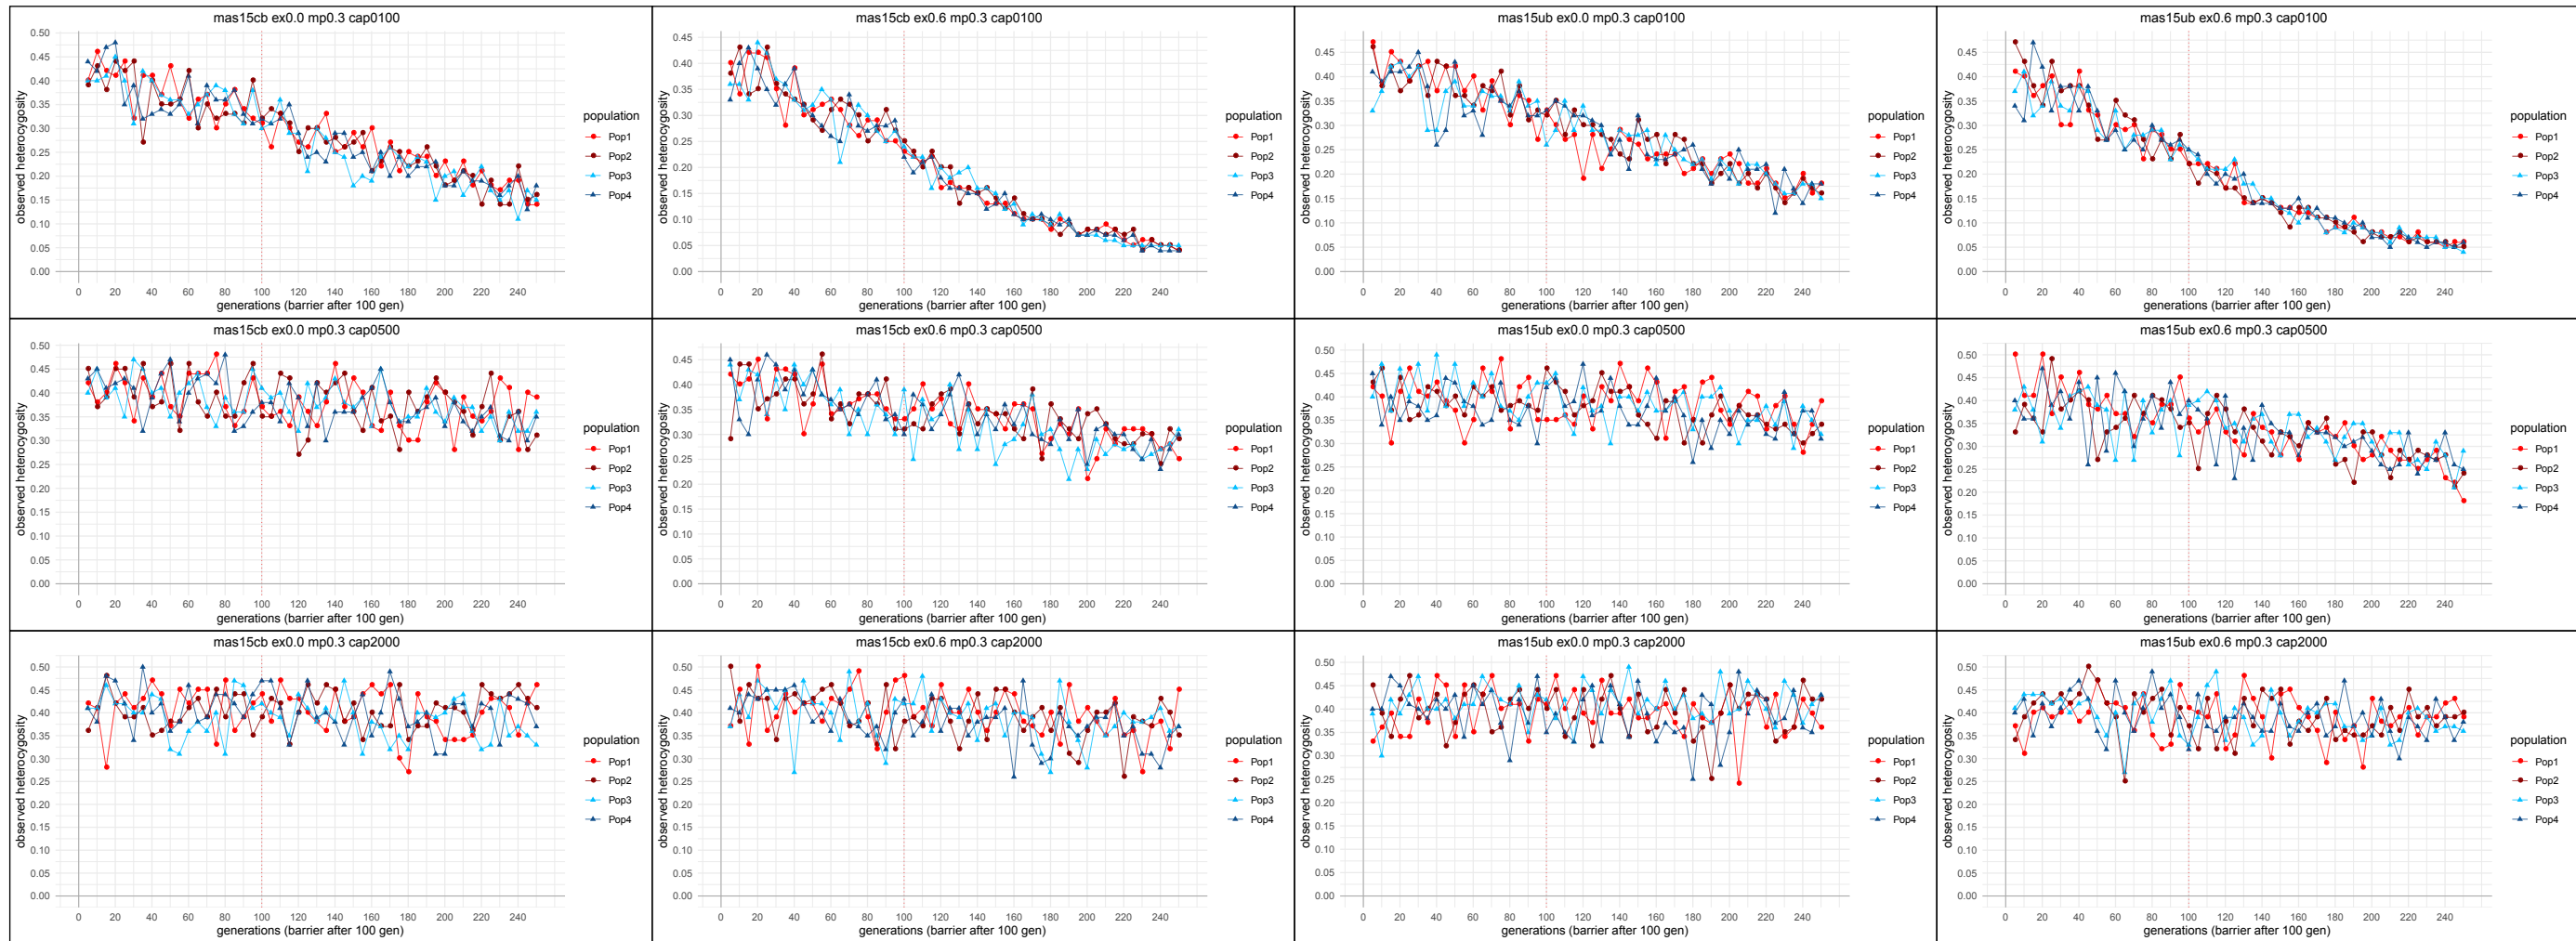

Supplement: ECE3-12-e8807-s011.pdf [file ECE3-12-e8807-s011.pdf]
