# Supplementary material for: Individual small in‐stream barriers contribute little to strong local population genetic structure five strictly aquatic macroinvertebrate taxa
Source: PubMed Central journal article supplement (PMC9006233; doi:10.1002/ece3.8807), 2022-04-13
Supplement: ECE3-12-e8807-s017.pdf [file ECE3-12-e8807-s017.pdf]

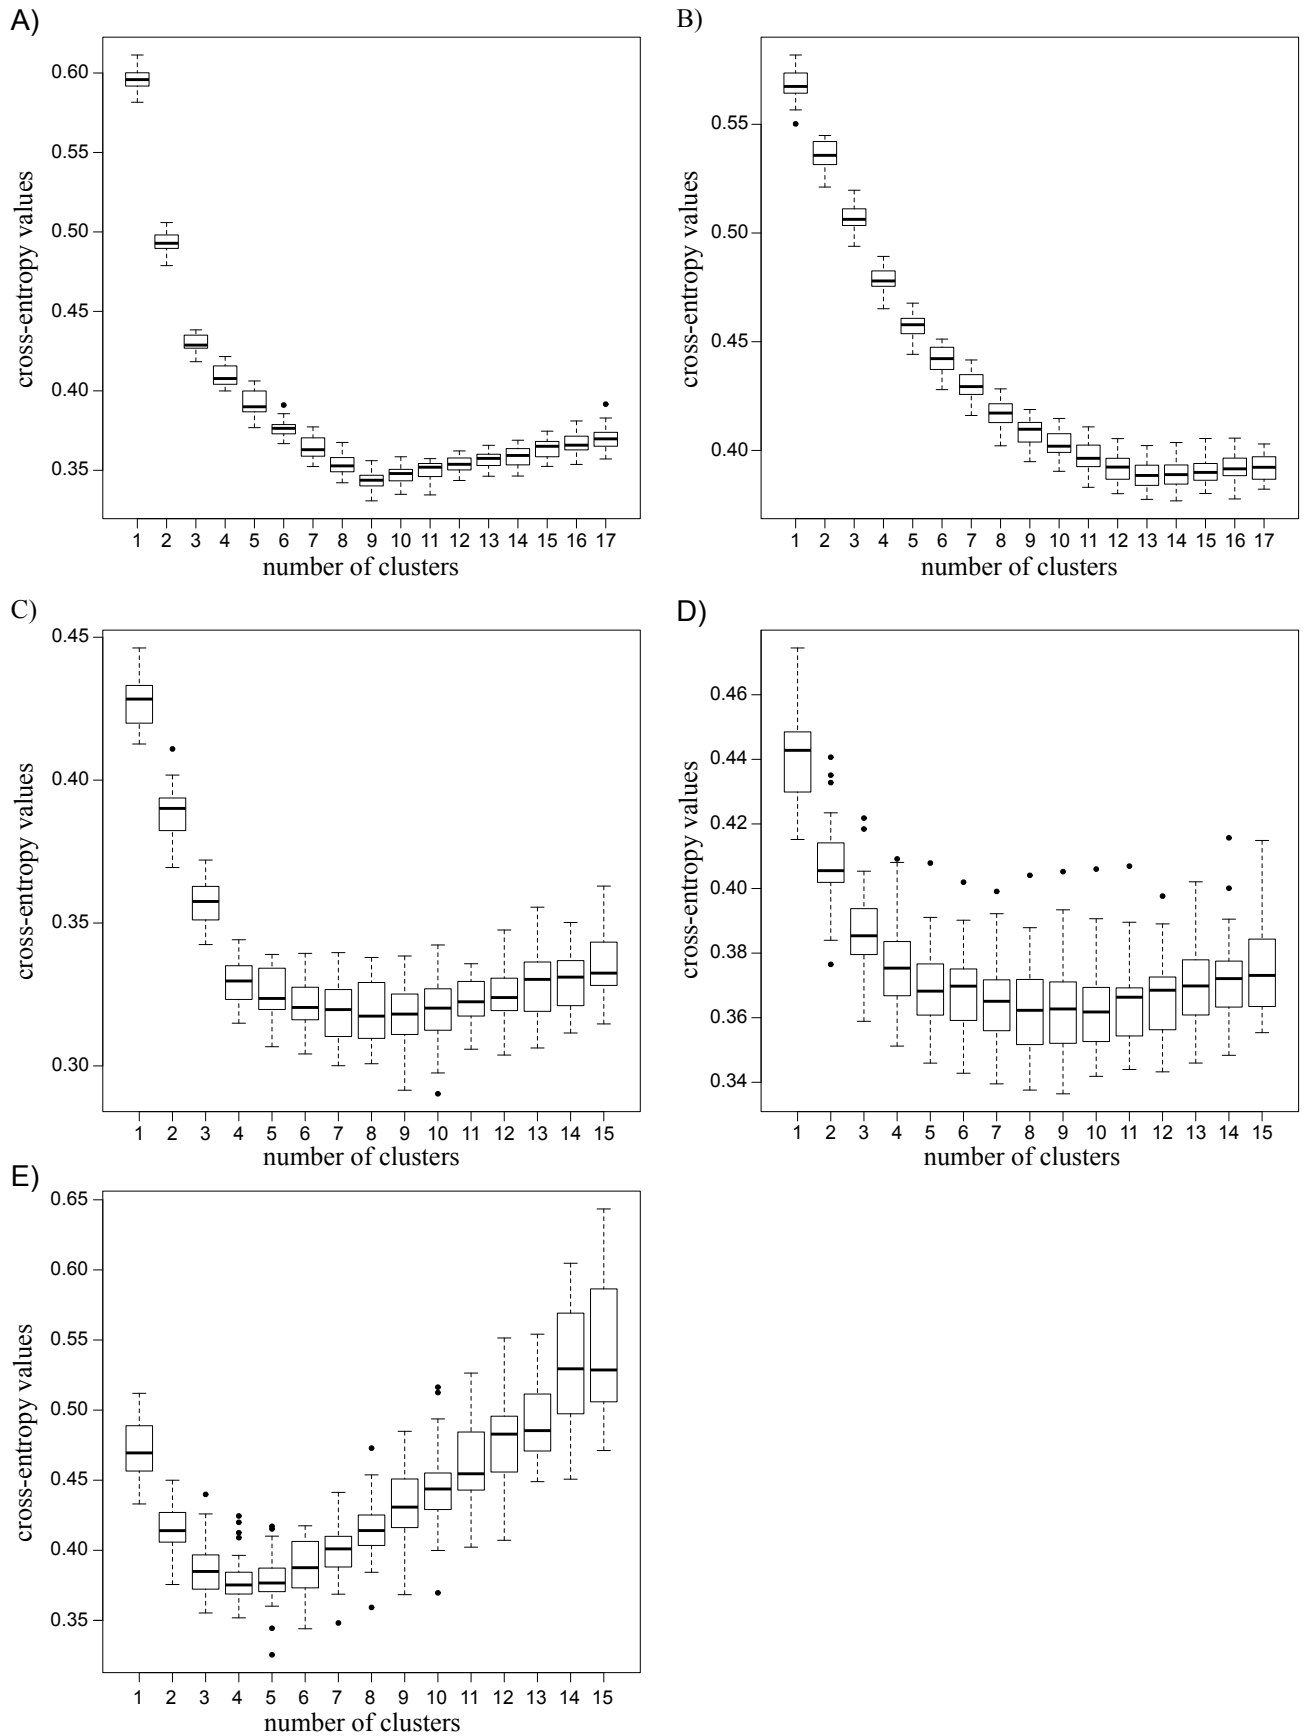

**Figure S3.** Standard boxplots of cross-entropy values (30 repeats) of sNMF analysis for final ddRAD datasets for the different taxa. A) *G. fossarum*, B) *D. gonocephala*, C-E) *A. fluviatilis* I, II and III.
